# Supplementary material
Source: PubMed Central journal article supplement (PMC3006225)
Supplement: NIHMS195102-supplement-Suppl_Methods.pdf [file NIHMS195102-supplement-Suppl_Methods.pdf]

## SUPPORTING INFORMATION MATERIALS AND METHODS

### **FACS-sorting and RNA isolation**

MECs were isolated from twenty 10-week old C57BL/6 wildtype mice and stained with antibodies that recognize cell surface stem/progenitor cell markers (Table S2) as described in Materials and Methods. Cells were sorted on a FACS Aria Cell Sorting Flow Cytometer (BD Biosciences) and RNA was isolated from each subpopulation using the Arcturus Pico Pure RNA isolation kit (Molecular Devices, Sunnyvale, CA). A post-sort analysis was performed to assess the purity of the cell populations and was estimated to be 99.6% for LIN<sup>-</sup> cells, 98.6% for LIN<sup>-</sup>CD24<sup>+</sup>CD29<sup>hi</sup> cells, 97.9% for LIN<sup>-</sup>CD24<sup>hi</sup>CD29<sup>lo</sup>CD61<sup>+</sup> cells, 98.1% for LIN<sup>-</sup>CD24<sup>hi</sup>CD29<sup>lo</sup>CD61<sup>-</sup> cells, 98.9% for LIN<sup>-</sup>CD24<sup>hi</sup>Sca1<sup>hi</sup> cells, 98.3% for LIN<sup>-</sup>CD24<sup>hi</sup>Sca1<sup>lo</sup> cells, 97.4% for LIN<sup>-</sup>CD24<sup>lo</sup>Sca1<sup>lo</sup> cells, and 97.1% for LIN<sup>-</sup>CD24<sup>lo</sup>Sca1<sup>-</sup> cells. The mRNA was then amplified using a NuGEN FFPE amplification kit (NuGEN, San Carlos, CA) and qPCR was performed as described in Materials and Methods. The experiment was performed three times.

### **Affymetrix microarray analysis**

MECs were isolated from 2 paired sets of wildtype and germline C/EBP $\beta$ <sup>-/-</sup> glands (10 mice per group), FACS-sorted based on CD24, CD29 and LIN expression, and total RNA was isolated using the Arcturus Pico Pure RNA isolation kit (Molecular Devices). A post-sort analysis was performed to assess the purity of the cell populations and was estimated to be 98.4%  $\pm$  0.3 for LIN<sup>-</sup>CD24<sup>hi</sup>CD29<sup>lo</sup> cells and 98.7%  $\pm$  0.4 for LIN<sup>-</sup>CD24<sup>+</sup>CD29<sup>hi</sup> cells. The mRNA was then amplified using a NuGEN FFPE amplification kit (NuGEN), followed by DNA fragmentation, biotinylation and hybridization onto Affymetrix Mouse 430 2.0 array chips. CEL files were processed using dChip (PM-MM model, quantile normalization) [55]. Probe sets with an

average signal <40 units were omitted. We performed ANOVA analysis for differential expression among any of the 4 experimental groups. Within each of the 2 subpopulations profiled (LIN<sup>-</sup>CD24<sup>hi</sup>CD29<sup>lo</sup>, LIN<sup>-</sup>CD24<sup>+</sup>CD29<sup>hi</sup>), log-transformed gene expression values were centered on the average of the corresponding wildtype group. Using this centered version of the dataset, significant genes were clustered using the method described by Creighton *et al* [56]. Expression array data can be accessed at the National Center for Biotechnology Information Gene Expression Omnibus (GEO) Database, accession number GSE16380.

#### SUPPORTING INFORMATION FIGURE LEGENDS

**Figure S1.** C/EBP $\beta$  mRNA is enriched in CD24<sup>lo</sup>Sca1<sup>-</sup> progenitors. MECs were isolated from 10-week old C57BL/6 wildtype mice and RNA was isolated from FACS-sorted stem/progenitor cell populations. **(A)** Dot/contour plots depict specific gates drawn for each subpopulation that was sorted. For all sorted cell populations, lineage-positive cells were excluded using a mouse lineage panel kit plus biotin-conjugated CD31 and CD140a antibodies. **(B)** qPCR showed that C/EBP $\beta$  was enriched in the LIN<sup>-</sup>CD24<sup>lo</sup>Sca1<sup>-</sup> as compared to all other subpopulations analyzed (n=3).

**Figure S2.** Differentially expressed genes in C/EBP $\beta$ <sup>-/-</sup> stem/progenitor cell subpopulations. **(A)** Dot plots depict specific gates drawn for each subpopulation that was sorted. For all sorted cell populations, lineage-positive cells were excluded. **(B)** Heat map illustrates 181 differentially expressed transcripts that were significantly changed (p<0.001, ANOVA) in C/EBP $\beta$ <sup>-/-</sup> MECs as compared to wildtype in either LIN<sup>-</sup>CD24<sup>hi</sup>CD29<sup>lo</sup> or LIN<sup>-</sup>CD24<sup>+</sup>CD29<sup>hi</sup> subpopulations (fold change >1.4). Among this group, 46 probe sets (ps) represented genes that appeared

differentially expressed in the LIN<sup>-</sup>CD24<sup>hi</sup>CD29<sup>lo</sup> subpopulation alone (19 up and 27 down), 58 ps were altered in the LIN<sup>-</sup>CD24<sup>+</sup>CD29<sup>hi</sup> subpopulation, and 77 ps were significantly changed in both subpopulations. Each row represents a transcript, and each column depicts the subpopulation analyzed in wildtype or C/EBPβ<sup>-/-</sup> cells. The yellow color indicates a high level of expression as compared to wildtype, the blue color indicates a low level of expression, and black depicts no change. The numbers of gene transcripts (i.e. Affymetrix probe sets) for each gene cluster are indicated.

SUPPORTING INFORMATION TABLES

**Table S1: Primer sequences for real-time PCR**

| Gene Name                  | Sense Primer (5'-3')     | Antisense Primer (5'-3')   |
|----------------------------|--------------------------|----------------------------|
| C/EBP $\beta$ <sup>a</sup> | TGATGCAATCCGGATCAA       | CACGTGTGTTGCGTCAGTC        |
| Pbx-1 <sup>a</sup>         | CAACAGTGCGCTGCTAAGG      | CAGTTGGAGGTATCAGAGTGAACA   |
| Krt15 <sup>a</sup>         | GGAAGAGATCCGGGACAAA      | TGTCAATCTCCAGGACAACG       |
| Krt5 <sup>a</sup>          | TGGAGATCGCCACCTACAG      | TGACTGGTCCAACCTCCTTCC      |
| Sca-1 <sup>a</sup>         | CCCCTACCCTGATGGAGTCT     | TGTTCTTTACTTTCCTTGTTTGAGAA |
| Tagln <sup>a</sup>         | CCTTCCAGTCCACAAACGAC     | GTAGGATGGACCCTTGTTGG       |
| Eya-1 <sup>a</sup>         | GGGTCTTTAGACAGTTTCTCAGGT | TGGGTATGATCTGTTGGAAGG      |
| Notch3 <sup>c</sup>        | AGATCAATGAGTGTGCATCC     | GCAGACTCCATGACTACAGG       |
| $\Delta$ Np63              | GAAAACAATGCCCAGACTCAA    | TGTGCGTGGTCTGTGTTG         |
| 18S rRNA <sup>b</sup>      | GTAACCCGTTGAACCCCAT      | CCATCCAATCGGTAGTAGCG       |

<sup>a</sup> Sequences were designed using the Universal ProbeLibrary Assay Design Center, Roche Applied Biosciences (<http://qpcr.probefinder.com/roche3.html>)

<sup>b</sup> Sequences were derived from Asselin-Labat *et al* [1]

<sup>c</sup> Sequences were derived from Bouras *et al* [43]

**Table S2: List of Antibodies**

| Antibody                   | Vendor         | Catalog Number |
|----------------------------|----------------|----------------|
| CD24-PE                    | BD Biosciences | 553262         |
| CD24-FITC                  | BD Biosciences | 553261         |
| CD29-FITC                  | Biolegend      | 102206         |
| CD61-Alexa Fluor® 647      | Biolegend      | 104314         |
| Sca1(Ly6A/E)-PE            | BD Biosciences | 553336         |
| LIN-biotin <sup>a</sup>    | BD Biosciences | 559971         |
| CD140a-biotin <sup>a</sup> | eBioscience    | 13-1401        |
| CD31-biotin <sup>a</sup>   | BD Biosciences | 553371         |
| Streptavidin-APC           | BD Biosciences | 554067         |
| Streptavidin-PE-Cy7        | BD Biosciences | 557598         |

<sup>a</sup> Included in lineage exclusion (LIN)

**Table S3: Microarray results**

| Probe Set    | Gene Symbol   | Entrez<br>Gene | Fold Change in<br>LIN <sup>+</sup> CD24 <sup>hi</sup> CD29 <sup>lo</sup><br>subpopulation <sup>a</sup> | Fold Change in<br>LIN <sup>+</sup> CD24 <sup>+</sup> CD29 <sup>hi</sup><br>subpopulation <sup>a</sup> | P-value<br>(ANOVA) |
|--------------|---------------|----------------|--------------------------------------------------------------------------------------------------------|-------------------------------------------------------------------------------------------------------|--------------------|
| 1430014_at   | 5430419D17Rik | 71395          | + 9.64                                                                                                 |                                                                                                       | 1.6E-04            |
| 1449542_at   | Pbx-1         | 18514          | + 3.30                                                                                                 |                                                                                                       | 5.1E-04            |
| 1455188_at   | Ephb1         | 270190         | + 2.49                                                                                                 |                                                                                                       | 5.9E-04            |
| 1422667_at   | Krt15         | 16665          | + 2.12                                                                                                 |                                                                                                       | 3.5E-05            |
| 1434964_at   | X83328        | 13929          | + 1.89                                                                                                 |                                                                                                       | 6.3E-04            |
| 1420960_at   | Fancg         | 60534          | + 1.86                                                                                                 |                                                                                                       | 1.4E-04            |
| 1424282_at   | Pet112l       | 229487         | + 1.82                                                                                                 |                                                                                                       | 8.7E-04            |
| 1437696_at   | BC049807      | 381066         | + 1.82                                                                                                 |                                                                                                       | 2.3E-04            |
| 1435085_at   | Crebl2        | 232430         | + 1.74                                                                                                 |                                                                                                       | 1.7E-04            |
| 1460347_at   | Krt14         | 16664          | + 1.73                                                                                                 |                                                                                                       | 1.9E-04            |
| 1417787_at   | Dkk1l         | 50722          | + 1.70                                                                                                 |                                                                                                       | 1.3E-04            |
| 1451844_at   | Prlr          | 19116          | + 1.65                                                                                                 |                                                                                                       | 5.8E-04            |
| 1440330_at   | Hist1h2be     | 319179         | + 1.62                                                                                                 |                                                                                                       | 2.4E-04            |
| 1424096_at   | Krt5          | 110308         | + 1.50                                                                                                 |                                                                                                       | 2.6E-05            |
| 1450928_at   | Id4           | 15904          | + 1.48                                                                                                 |                                                                                                       | 7.7E-04            |
| 1441206_at   | Synpo2        | 118449         | + 1.47                                                                                                 |                                                                                                       | 8.7E-04            |
| 1430651_s_at | Zfp191        | 59057          | + 1.46                                                                                                 |                                                                                                       | 1.3E-04            |
| 1448897_at   | Mkrm2         | 67027          | + 1.43                                                                                                 |                                                                                                       | 4.7E-04            |
| 1423935_x_at | Krt14         | 16664          | + 1.42                                                                                                 |                                                                                                       | 4.9E-04            |
| 1419671_a_at | Il17rc        | 171095         | - 5.71                                                                                                 |                                                                                                       | 6.8E-04            |

|              |               |        |        |         |
|--------------|---------------|--------|--------|---------|
| 1433972_at   | Camta1        | 100072 | - 5.40 | 2.5E-04 |
| 1447608_x_at | Btbd14a       | 67991  | - 3.40 | 6.2E-04 |
| 1453055_at   | Sema6d        | 214968 | - 3.25 | 1.3E-04 |
| 1423505_at   | Tagln         | 21345  | - 3.19 | 1.5E-04 |
| 1418569_at   | Fblim1        | 74202  | - 3.05 | 4.9E-05 |
| 1416882_at   | Rgs10         | 67865  | - 2.80 | 6.3E-04 |
| 1425505_at   | Mylk          | 107589 | - 2.40 | 3.9E-04 |
| 1429206_at   | Rhobtb1       | 69288  | - 2.25 | 6.6E-04 |
| 1454632_at   | 6330442E10Rik | 268567 | - 2.15 | 7.1E-04 |
| 1448552_s_at | 2310028N02Rik | 66950  | - 2.13 | 8.8E-04 |
| 1425826_a_at | Sorbs1        | 20411  | - 2.06 | 3.2E-04 |
| 1434936_at   | Hirip3        | 233876 | - 2.01 | 1.9E-04 |
| 1426887_at   | Nudt11        | 58242  | - 2.00 | 7.7E-04 |
| 1426677_at   | Flna          | 192176 | - 1.86 | 6.8E-04 |
| 1423587_a_at | Exosc10       | 50912  | - 1.85 | 7.7E-04 |
| 1417022_at   | Slc7a3        | 11989  | - 1.82 | 2.1E-05 |
| 1416454_s_at | Acta2         | 11475  | - 1.80 | 7.7E-06 |
| 1417329_at   | Slc23a2       | 54338  | - 1.78 | 4.9E-04 |
| 1449085_at   | Phf10         | 72057  | - 1.73 | 1.7E-04 |
| 1417984_at   | Ube2v2        | 70620  | - 1.62 | 6.6E-04 |
| 1428471_at   | Sorbs1        | 20411  | - 1.49 | 3.8E-04 |
| 1427476_a_at | Trim32        | 69807  | - 1.50 | 2.5E-04 |
| 1431375_s_at | Parva         | 57342  | - 1.48 | 1.1E-04 |
| 1437194_x_at | 1200011O22Rik | 71735  | - 1.45 | 6.3E-04 |

|              |               |           |        |        |         |
|--------------|---------------|-----------|--------|--------|---------|
| 1458963_at   | 1810054D07Rik | 69863     | - 1.43 |        | 7.5E-04 |
| 1436069_at   | Ing5          | 66262     | - 1.43 |        | 8.5E-04 |
| 1429761_at   | Rtn1          | 104001    | + 4.33 | + 1.95 | 1.7E-04 |
| 1452426_x_at | Zfp236        | 329002    | + 2.73 | + 2.16 | 1.5E-04 |
| 1452508_x_at | Ptms          | 69202     | + 2.26 | + 2.04 | 1.8E-04 |
| 1458813_at   | Scn5a         | 20271     | + 2.17 | + 2.72 | 2.9E-04 |
| 1424976_at   | Rhov          | 228543    | + 2.10 | + 1.55 | 1.4E-04 |
| 1455404_at   | Jph2          | 59091     | + 2.02 | + 1.41 | 7.8E-06 |
| 1426296_at   | Rad52         | 19365     | + 1.90 | + 1.71 | 1.4E-04 |
| 1460431_at   | Gcnt1         | 14537     | + 1.83 | + 3.33 | 8.7E-04 |
| 1438211_s_at | Dbp           | 13170     | + 1.63 | + 2.44 | 1.0E-04 |
| 1452367_at   | Coro2a        | 107684    | + 1.61 | + 1.40 | 3.7E-04 |
| 1432919_at   | 4921511E18Rik | 70879     | + 1.59 | + 2.63 | 9.2E-04 |
| 1418174_at   | Dbp           | 13170     | + 1.57 | + 1.93 | 1.3E-04 |
| 1426230_at   | Sphk2         | 56632     | + 1.51 | + 1.90 | 1.3E-05 |
| 1448297_a_at | Tnk2 ///      | 51789 /// | + 1.49 | + 1.61 | 8.7E-05 |
|              | LOC672286     | 672286    |        |        |         |
| 1422678_at   | Dgat2         | 67800     | + 1.49 | + 1.39 | 2.8E-04 |
| 1417812_a_at | Lamb3         | 16780     | + 1.49 | + 1.27 | 7.6E-06 |
| 1453371_at   | 4930535B03Rik | 75137     | + 1.46 | + 1.56 | 7.9E-04 |
| 1424175_at   | Tef           | 21685     | + 1.39 | + 1.72 | 6.2E-04 |
| 1455678_at   | Sema4b        | 20352     | + 1.38 | + 1.49 | 5.2E-04 |
| 1428067_at   | Ras12         | 70784     | + 1.38 | + 1.73 | 3.5E-04 |
| 1422869_at   | Mertk         | 17289     | + 1.35 | + 1.46 | 1.8E-04 |



|              |               |        |        |        |         |
|--------------|---------------|--------|--------|--------|---------|
| 1446856_at   | D3Wsu167e     | 28044  | + 1.35 | + 1.53 | 4.7E-04 |
| 1418412_at   | Tpd5211       | 21987  | + 1.34 | + 1.58 | 2.6E-04 |
| 1418749_at   | Psd3          | 234353 | + 1.32 | + 1.77 | 1.8E-05 |
| 1434548_at   | Serinc3       | 26943  | - 4.83 | - 3.59 | 6.8E-05 |
| 1428875_at   | Golph4        | 73124  | - 2.70 | - 1.65 | 4.3E-04 |
| 1449047_at   | Hacl1         | 56794  | - 2.45 | - 3.02 | 5.5E-04 |
| 1419549_at   | Arg1          | 11846  | - 2.40 | - 3.97 | 3.6E-04 |
| 1422643_at   | Moxd1         | 59012  | - 1.92 | - 1.85 | 4.3E-05 |
| 1457273_at   | LOC669490     | 669490 | - 1.86 | - 2.20 | 1.5E-04 |
| 1455117_at   | Mcmdc1        | 71567  | - 1.69 | - 2.95 | 6.9E-04 |
| 1449184_at   | Pglyrp1       | 21946  | - 1.63 | - 2.09 | 8.7E-04 |
| 1420543_at   | ORF28         | 246738 | - 1.63 | - 2.79 | 9.2E-04 |
| 1458268_s_at | Igfbp3        | 16009  | - 1.62 | - 1.71 | 1.8E-04 |
| 1449329_at   | Zfp235        | 56525  | - 1.57 | - 1.24 | 5.9E-04 |
| 1424692_at   | 2810055F11Rik | 67217  | - 1.55 | - 1.26 | 3.3E-04 |
| 1417580_s_at | Selenbp1      | 20341  | - 1.54 | - 1.17 | 7.8E-04 |
| 1448881_at   | Hp            | 15439  | - 1.44 | - 1.86 | 4.2E-04 |
| 1436600_at   | Tnrc9         | 244579 | - 1.44 | - 1.43 | 2.1E-04 |
| 1415822_at   | Scd2          | 20250  | - 1.40 | - 1.22 | 9.6E-04 |
| 1428117_x_at | Tmem181       | 77106  | - 1.37 | - 1.60 | 5.7E-04 |
| 1424035_at   | Rora          | 19883  | - 1.36 | - 1.79 | 8.5E-04 |
| 1434606_at   | Erbp3         | 13867  | - 1.34 | - 1.77 | 1.1E-05 |
| 1421812_at   | Tapbp         | 21356  | - 1.31 | - 1.44 | 6.9E-04 |
| 1415882_at   | Ghitm         | 66092  | - 1.31 | - 1.47 | 8.1E-04 |

|              |               |        |        |        |         |
|--------------|---------------|--------|--------|--------|---------|
| 1419739_at   | Tpm2          | 22004  | + 2.98 | - 1.50 | 7.3E-04 |
| 1424603_at   | Sumf1         | 58911  | + 2.23 | - 1.76 | 5.9E-05 |
| 1421761_a_at | Barx2         | 12023  | + 1.94 | - 2.56 | 4.2E-04 |
| 1458496_at   | Cyb561        | 13056  | + 1.69 | - 1.43 | 8.3E-06 |
| 1428378_at   | Zc3hav1       | 78781  | + 1.58 | - 1.28 | 3.8E-04 |
| 1422092_at   | Pfkfb2        | 18640  | + 1.57 | - 2.12 | 7.0E-04 |
| 1444500_at   | Ahsa1         | 217737 | + 1.51 | - 1.20 | 4.1E-04 |
| 1427527_a_at | Pthlh         | 19227  | + 1.48 | - 1.94 | 8.0E-04 |
| 1452027_a_at | Trp63         | 22061  | + 1.46 | - 1.59 | 5.0E-04 |
| 1436236_x_at | Cotl1         | 72042  | + 1.45 | - 1.82 | 7.4E-04 |
| 1441407_at   | Rod1          | 230257 | + 1.39 | - 2.17 | 9.5E-04 |
| 1423323_at   | Tacstd2       | 56753  | + 1.38 | - 1.46 | 9.9E-04 |
| 1436556_at   | Tmem139       | 109218 | + 1.34 | - 1.43 | 5.8E-04 |
| 1459733_at   | Pea15         | 18611  | + 1.31 | - 1.47 | 7.5E-04 |
| 1426859_at   | Inhbb         | 16324  | + 1.29 | - 1.71 | 6.2E-04 |
| 1454254_s_at | 1600029D21Rik | 76509  | + 1.27 | - 1.44 | 8.4E-04 |
| 1425163_at   | AI661453      | 224833 | + 1.25 | - 1.56 | 2.4E-04 |
| 1435576_at   | AW413774      | 106046 | + 1.22 | - 1.60 | 8.9E-04 |
| 1441464_at   | A630035D09Rik | 319627 | + 1.17 | - 1.45 | 2.2E-05 |
| 1448946_at   | Kif3c         | 16570  | - 1.20 | + 1.51 | 6.7E-05 |
| 1455420_at   | Rad23b        | 19359  | - 1.20 | + 1.49 | 9.7E-04 |
| 1430521_s_at | Cpne8         | 66871  | - 1.37 | + 1.88 | 5.8E-04 |
| 1424470_a_at | Rapgef3       | 223864 | - 1.37 | + 1.64 | 5.7E-04 |

|              |               |           |        |        |         |
|--------------|---------------|-----------|--------|--------|---------|
| 1452768_at   | Tex261        | 21766     | - 1.49 | + 1.26 | 7.3E-04 |
| 1455007_s_at | Gpt2          | 108682    | - 1.55 | + 1.32 | 4.9E-04 |
| 1434542_at   | Gpt2          | 108682    | - 1.87 | + 1.35 | 4.9E-04 |
| 1424133_at   | Tmem98        | 103743    | - 1.91 | +1.28  | 6.0E-04 |
| 1427320_at   | Copg2as2      | 54158     | - 2.48 | + 2.25 | 1.5E-05 |
| 1454752_at   | LOC380843 /// | 380843    | - 2.97 | + 1.92 | 9.0E-04 |
|              | LOC638266 /// | ///638266 |        |        |         |
|              | Rbm24         | ///666794 |        |        |         |
| 1423222_at   | Cap2          | 67252     | - 4.53 | + 1.80 | 2.0E-04 |
| 1419906_at   | Hpgd          | 15446     |        | + 7.52 | 9.4E-04 |
| 1421727_at   | Eya1          | 14048     |        | + 3.52 | 1.4E-05 |
| 1420650_at   | Atbf1         | 11906     |        | + 3.30 | 6.4E-04 |
| 1449106_at   | Gpx3          | 14778     |        | + 2.76 | 3.5E-04 |
| 1428434_at   | Zcchc12       | 72693     |        | + 2.66 | 1.1E-04 |
| 1424719_a_at | Mapt          | 17762     |        | + 2.65 | 3.4E-04 |
| 1437800_at   | Edaradd       | 171211    |        | + 2.19 | 5.3E-04 |
| 1453267_at   | Atbf1         | 11906     |        | + 2.03 | 3.8E-04 |
| 1420351_at   | Tnfrsf4       | 22163     |        | + 1.90 | 1.2E-04 |
| 1427176_s_at | AI428936      | 233066    |        | + 1.78 | 8.3E-04 |
| 1453264_at   | Marveld3      | 73608     |        | + 1.75 | 2.4E-04 |
| 1424030_at   | Grhl1         | 195733    |        | + 1.65 | 5.6E-04 |
| 1434044_at   | Repin1        | 58887     |        | + 1.63 | 3.4E-04 |
| 1436844_at   | AW046287      | 107018    |        | + 1.59 | 4.6E-04 |
| 1451321_a_at | 0610033I05Rik | 71684     |        | + 1.55 | 6.0E-05 |

|              |               |           |        |         |
|--------------|---------------|-----------|--------|---------|
| 1416125_at   | Fkbp5         | 14229     | + 1.53 | 5.0E-04 |
| 1420138_at   | Slc19a1       | 20509     | + 1.50 | 2.9E-04 |
| 1458707_at   | E430016F16Rik | 414121    | + 1.43 | 4.9E-04 |
| 1419829_a_at | Gab2          | 14389     | + 1.43 | 4.9E-04 |
| 1448870_at   | Ltbp1         | 268977    | + 1.40 | 4.8E-05 |
| 1451206_s_at | Pscdbp        | 227929    | - 5.00 | 7.3E-04 |
| 1450395_at   | Slc22a5       | 20520     | - 4.24 | 3.7E-04 |
| 1441102_at   | Prlr          | 19116     | - 3.21 | 6.5E-05 |
| 1455355_at   | 6030408C04Rik | 217558    | - 3.10 | 3.4E-04 |
| 1420718_at   | Odz2 ///      | 23964 /// | - 3.01 | 5.4E-05 |
|              | LOC669490     | 669490    |        |         |
| 1443602_at   | Ifngr1        | 15979     | - 2.92 | 6.3E-04 |
| 1456428_at   | Cxcl15        | 20309     | - 2.62 | 3.6E-04 |
| 1417089_a_at | Ckmt1         | 12716     | - 1.06 | 1.6E-04 |
| 1424404_at   | 0610040J01Rik | 76261     | - 2.48 | 1.2E-04 |
| 1418294_at   | Epb4.114b     | 54357     | - 2.35 | 1.3E-04 |
| 1427477_at   | Tmprss13      | 214531    | - 2.25 | 2.4E-04 |
| 1423952_a_at | Krt7          | 110310    | - 2.06 | 6.6E-04 |
| 1455030_at   | Ptprj         | 19271     | - 2.06 | 4.6E-04 |
| 1424351_at   | Wfdc2         | 67701     | - 1.92 | 4.6E-04 |
| 1422418_s_at | Supt4h1 ///   | 20922 /// | - 1.88 | 2.8E-04 |
|              | Supt4h2       | 20923     |        |         |
| 1416389_a_at | Rcbtb2        | 105670    | - 1.85 | 2.0E-04 |
| 1421965_s_at | Notch3        | 18131     | - 1.83 | 3.3E-04 |

|              |               |        |        |         |
|--------------|---------------|--------|--------|---------|
| 1417214_at   | Rab27b        | 80718  | - 1.79 | 4.8E-04 |
| 1426098_a_at | Cast          | 12380  | - 1.74 | 3.5E-04 |
| 1452670_at   | Myl9          | 98932  | - 1.72 | 9.4E-04 |
| 1453392_at   | 1810054D07Rik | 69863  | - 1.71 | 5.7E-04 |
| 1417185_at   | Ly6a          | 110454 | - 1.67 | 4.9E-04 |
| 1416061_at   | Tbc1d15       | 66687  | - 1.67 | 6.7E-04 |
| 1450955_s_at | Sort1         | 20661  | - 1.67 | 4.1E-07 |
| 1448873_at   | Ocln          | 18260  | - 1.66 | 7.2E-04 |
| 1424604_s_at | Sumf1         | 58911  | - 1.65 | 3.9E-04 |
| 1436325_at   | Rora          | 19883  | - 1.63 | 5.7E-04 |
| 1417896_at   | Tjp3          | 27375  | - 1.58 | 5.6E-04 |
| 1460737_at   | Igbp1         | 18518  | - 1.57 | 3.9E-04 |
| 1428701_at   | Pvr14         | 71740  | - 1.55 | 5.2E-05 |
| 1436842_at   | B230380D07Rik | 235461 | - 1.54 | 2.8E-05 |
| 1417616_at   | St6galnac2    | 20446  | - 1.53 | 2.4E-04 |
| 1423062_at   | Igfbp3        | 16009  | - 1.50 | 2.0E-04 |
| 1452391_at   | Cxadr         | 13052  | - 1.48 | 5.9E-04 |
| 1426301_at   | Alcam         | 11658  | - 1.43 | 5.2E-04 |

---

<sup>a</sup> Mean of the mRNA fold change in the *C/EBPβ*<sup>-/-</sup> subpopulations as compared to wildtype.
