# Supplementary material
Source: PubMed Central journal article supplement (PMC3006225)

Figure S1

**A**

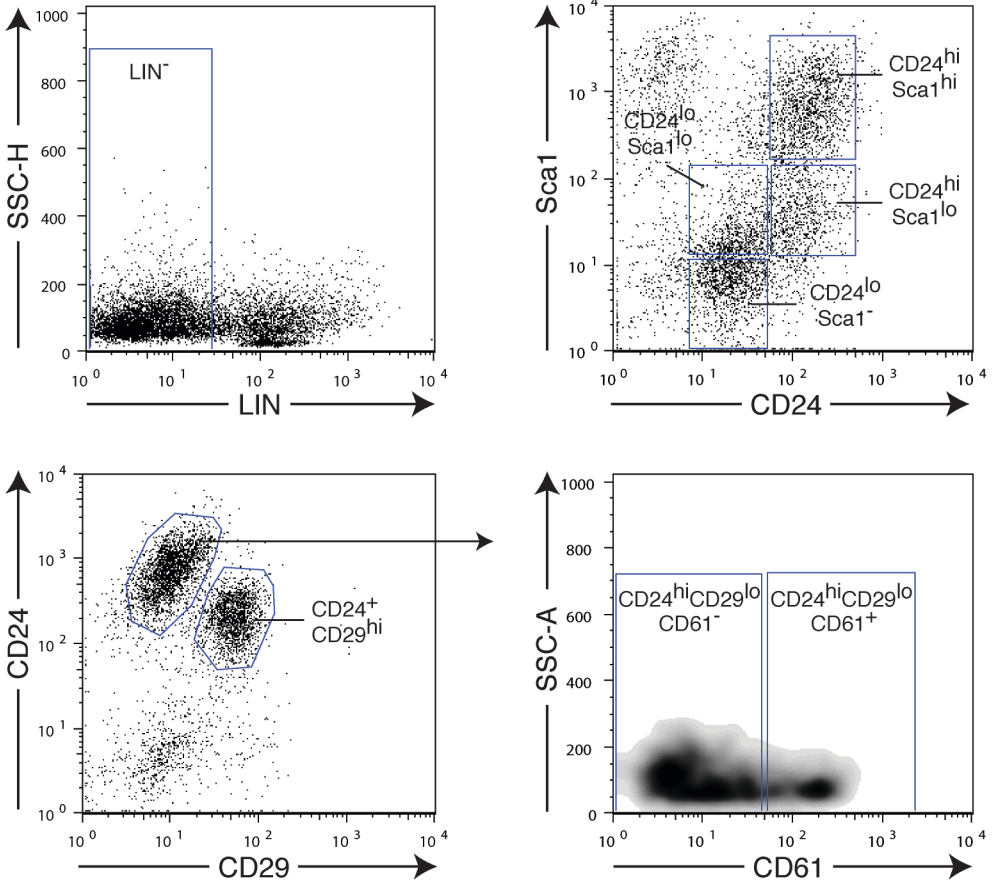

**B**

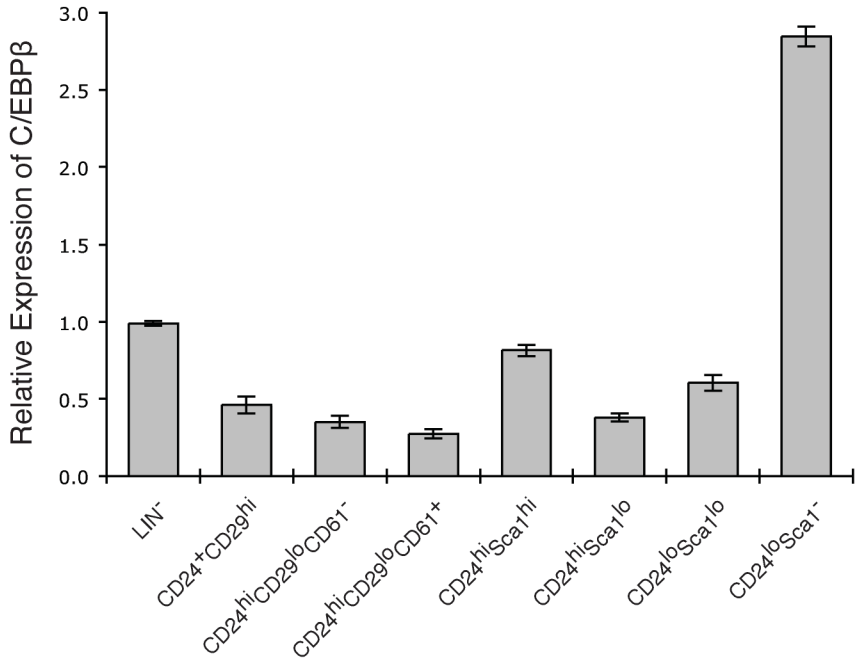

Supplement: NIHMS195102-supplement-Suppl_Fig_1.pdf [file NIHMS195102-supplement-Suppl_Fig_1.pdf]

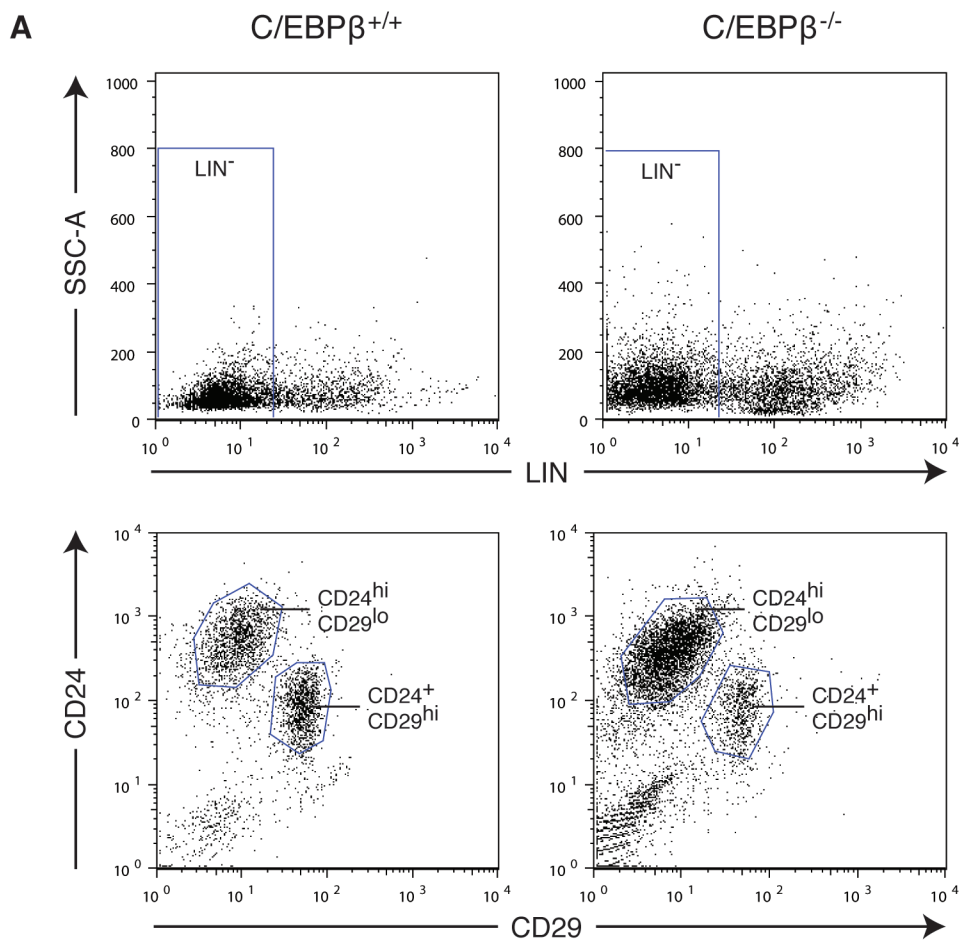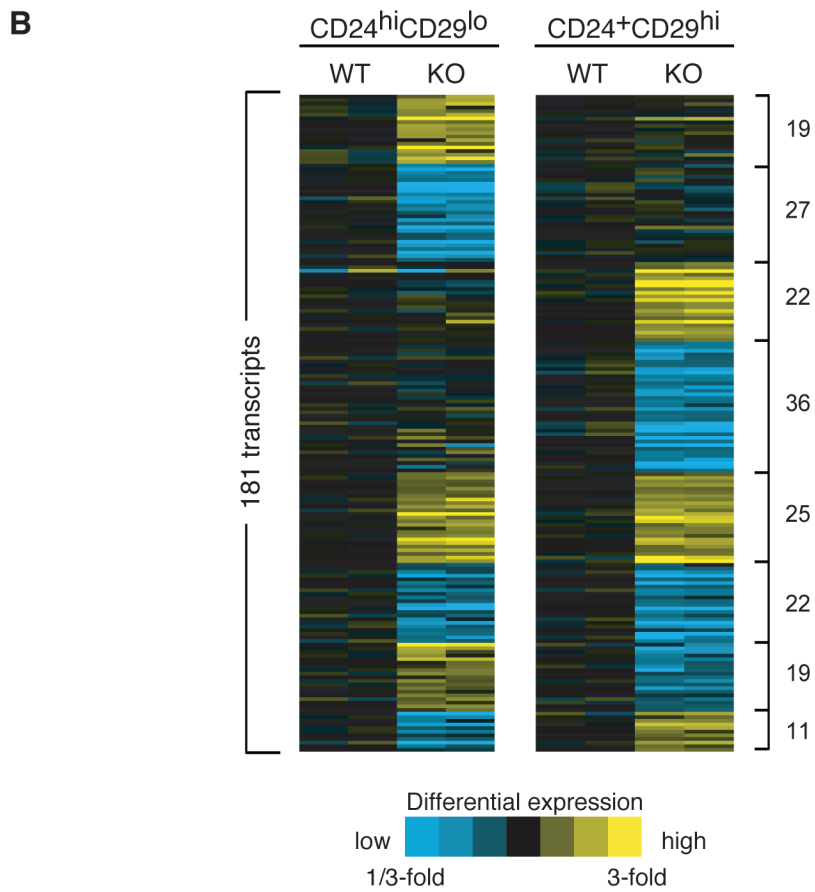

Supplement: NIHMS195102-supplement-Suppl_Fig_2.pdf [file NIHMS195102-supplement-Suppl_Fig_2.pdf]
